# Supplementary material for: Arsenite photo-oxidation and removal by ferrihydrite in the presence of oxalate: a pH dependence and surface-mediated process
Source: Royal Society of Chemistry journal article supplement (doi:10.1039/d1nj05219e), 2022-01-01
Supplement: d1nj05219e1.pdf [file d1nj05219e1.pdf]

1 **Supplementary information**

2 **for**

3  
4 **Arsenite photo-oxidation and removal by ferrihydrite in the presence of**  
5 **oxalate: pH dependence and surface-mediated process**

6 Yajie Wang<sup>1,\*</sup>, Xianhe Gong<sup>1</sup>, Xin Dong<sup>1</sup>, Xiuzhen Tao<sup>1</sup>, Yingchun Luo<sup>2,\*\*</sup>

7 <sup>1</sup> *School of Eco-Environmental Engineering, Guizhou Minzu University, Guiyang 50025, China*

8 <sup>2</sup> *School of Chemical Engineering, Guizhou Minzu University, Guiyang 550025, China*

9 *\*Corresponding author at: School of Eco-Environmental Engineering, Guizhou Minzu University, Guiyang 50025, China*

10 E-mail: [yajiewang@gzmu.edu.cn](mailto:yajiewang@gzmu.edu.cn) (Yajie Wang)

11 *\*\*Corresponding author at: School of Chemical Engineering, Guizhou Minzu University, Guiyang 550025, China*

12 E-mail: [1046984620@qq.com](mailto:1046984620@qq.com) (Yingchun Luo)

13

14

15

16

17

18

19

20

21 Table S1 Adsorption of As(III) by ferrihydrite in absence and presence of oxalate in ferrihydrite suspension at  
22 different pH values in darkness. Experimental conditions:  $[As]_0 = 100.0 \mu\text{g L}^{-1}$ ,  $[\text{ferrihydrite}] = 0.0125 \text{ g L}^{-1}$

| Removal efficiency (%) | in absence of oxalate |                 |                 |                 | in presence of $0.1 \text{ mmol L}^{-1}$ oxalate |                 |                 |                 |
|------------------------|-----------------------|-----------------|-----------------|-----------------|--------------------------------------------------|-----------------|-----------------|-----------------|
|                        | pH 3.0                | pH 5.0          | pH 7.0          | pH 9.0          | pH 3.0                                           | pH 5.0          | pH 7.0          | pH 9.0          |
|                        | $28.34 \pm 1.1$       | $46.23 \pm 2.0$ | $61.87 \pm 2.8$ | $63.32 \pm 1.9$ | $19.05 \pm 0.7$                                  | $22.20 \pm 1.8$ | $52.26 \pm 2.2$ | $52.25 \pm 3.1$ |
|                        | 7                     | 1               | 8               | 2               | 7                                                | 7               | 9               | 5               |

23

24

25

26

27

28

29

30

31

32

33

34

35

36

37

38

39 Table S2 Effect of ferrihydrite dosage on the As(III) concentration changes in darkness. Experimental  
40 conditions:  $[\text{As}]_0 = 100.0 \mu\text{g L}^{-1}$ ,  $[\text{oxalate}]_0 = 0.1 \text{ mmol L}^{-1}$ , pH 3.0

41

| Ferrihydrite dosage ( $\text{g}\cdot\text{L}^{-1}$ ) | As(III) concentration after 90min reaction in darkness( $\mu\text{g}\cdot\text{L}^{-1}$ ) |
|------------------------------------------------------|-------------------------------------------------------------------------------------------|
| 0.00                                                 | $99.45 \pm 0.34$                                                                          |
| 0.0125                                               | $93.17 \pm 1.33$                                                                          |
| 0.025                                                | $81.95 \pm 1.55$                                                                          |
| 0.25                                                 | $23.25 \pm 2.04$                                                                          |

43

44

45

46

47

48

49

50

51

52

53

54

55

56

57

58

59

60 Table S3 Effect of oxalate on the As(III) concentration changes in darkness. Experimental conditions:  $[As]_0 =$   
61  $100.0 \mu\text{g L}^{-1}$ ,  $[\text{ferrihydrite}] = 0.0125 \text{ g L}^{-1}$

62

| Oxalate concentration ( $\text{g L}^{-1}$ ) | As(III) concentration after 90 min reaction in darkness ( $\mu\text{g L}^{-1}$ ) |
|---------------------------------------------|----------------------------------------------------------------------------------|
| 0.0                                         | $71.66 \pm 0.34$                                                                 |
| 0.05                                        | $75.17 \pm 1.33$                                                                 |
| 0.1                                         | $81.95 \pm 1.55$                                                                 |
| 0.2                                         | $83.25 \pm 2.04$                                                                 |
| 0.5                                         | $87.66 \pm 1.09$                                                                 |

65

66

67

68

69

70

71

72

73

74

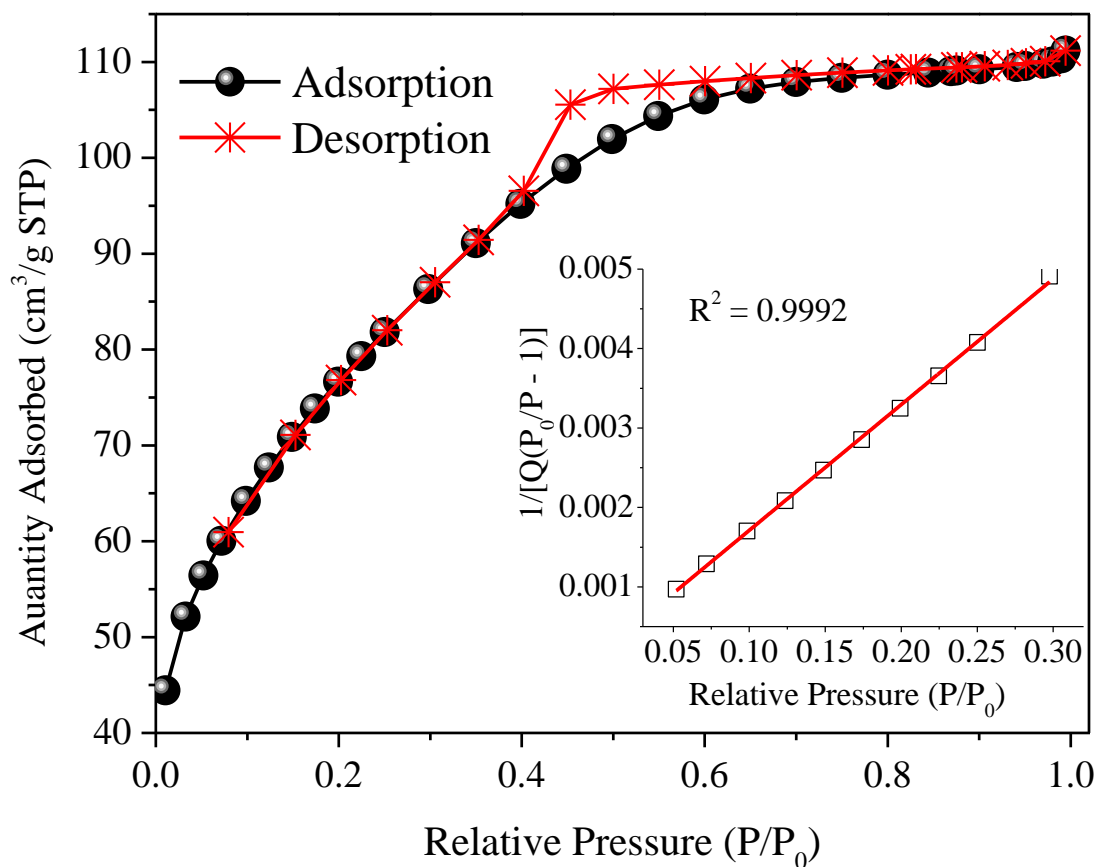

75

76 Fig.S1 N<sub>2</sub> adsorption desorption isotherm and fitting curve of the BET surface area of ferrihydrite

77

(inset)

78

79

80

81

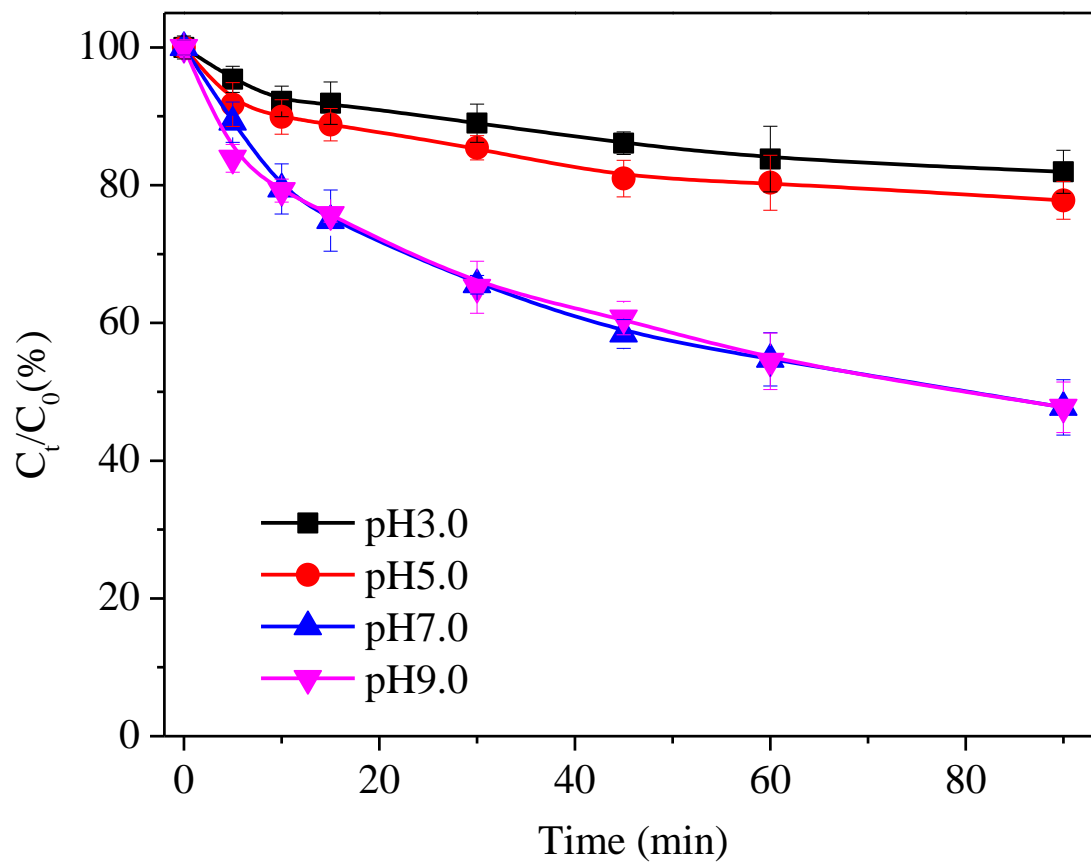

82

83

Fig.S2 As(III) removal in ferrihydrite/oxalate in the darkness at different pH conditions.

84

Experimental conditions:  $[As]_0 = 100.0 \mu\text{g}\cdot\text{L}^{-1}$ ,  $[\text{ferrihydrite}] = 0.0125 \text{ g}\cdot\text{L}^{-1}$ ,  $[\text{oxalate}]_0 = 0.1 \text{ mmol}\cdot$

85

$\text{L}^{-1}$

86

87

88

89

90

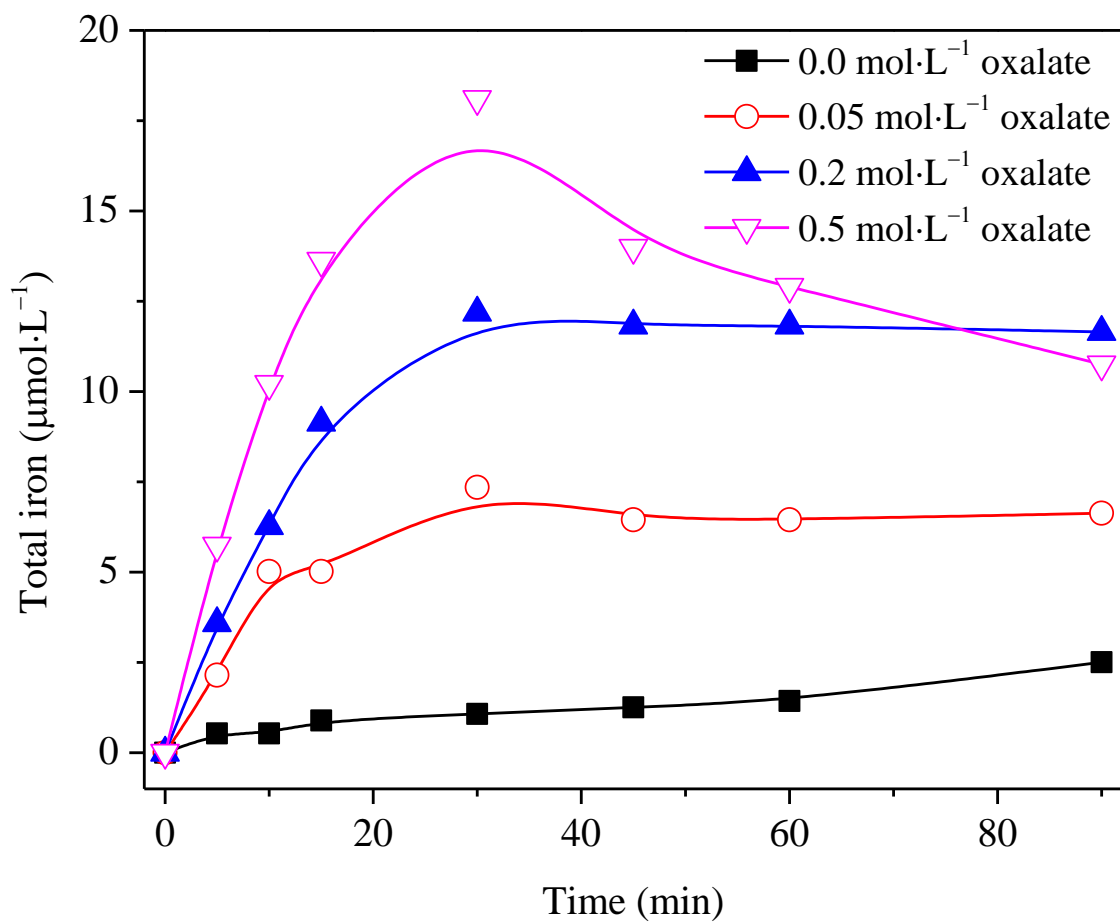

91

92 Fig.S3 Dissolution of iron ions in ferrihydrite system under different oxalate concentration at pH 3.0.

93 Experimental conditions:  $[\text{As}]_0 = 100.0 \mu\text{g}\cdot\text{L}^{-1}$ ,  $[\text{ferrihydrite}] = 0.0125 \text{g}\cdot\text{L}^{-1}$

94

95

96

97

98

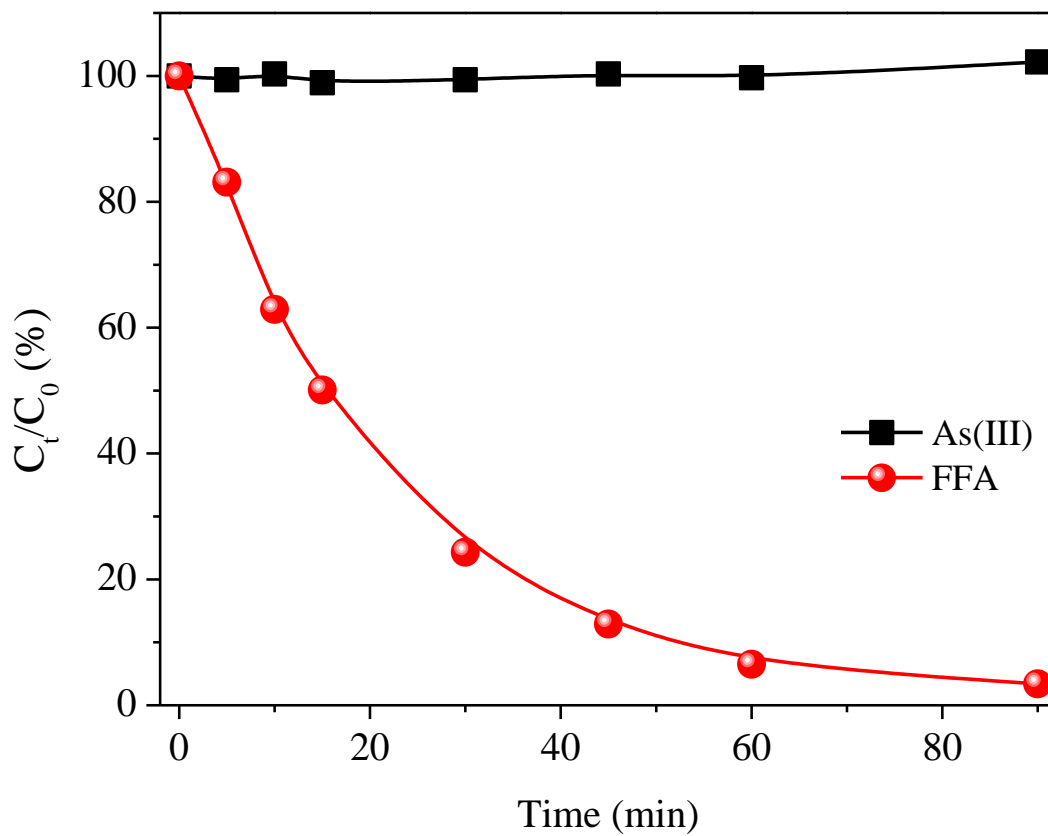

99

100 Fig.S4 Changes of As(III) and FFA concentration over time in the visible-light-MB<sup>+</sup> system.

101 Experimental conditions: [As]<sub>0</sub> = 100.0 μg·L<sup>-1</sup>, [MB<sup>+</sup>]<sub>0</sub> = 5 mg·L<sup>-1</sup>, [FFA]<sub>0</sub> = 10 μmol·L<sup>-1</sup>, pH 7.0

102

103

104

105



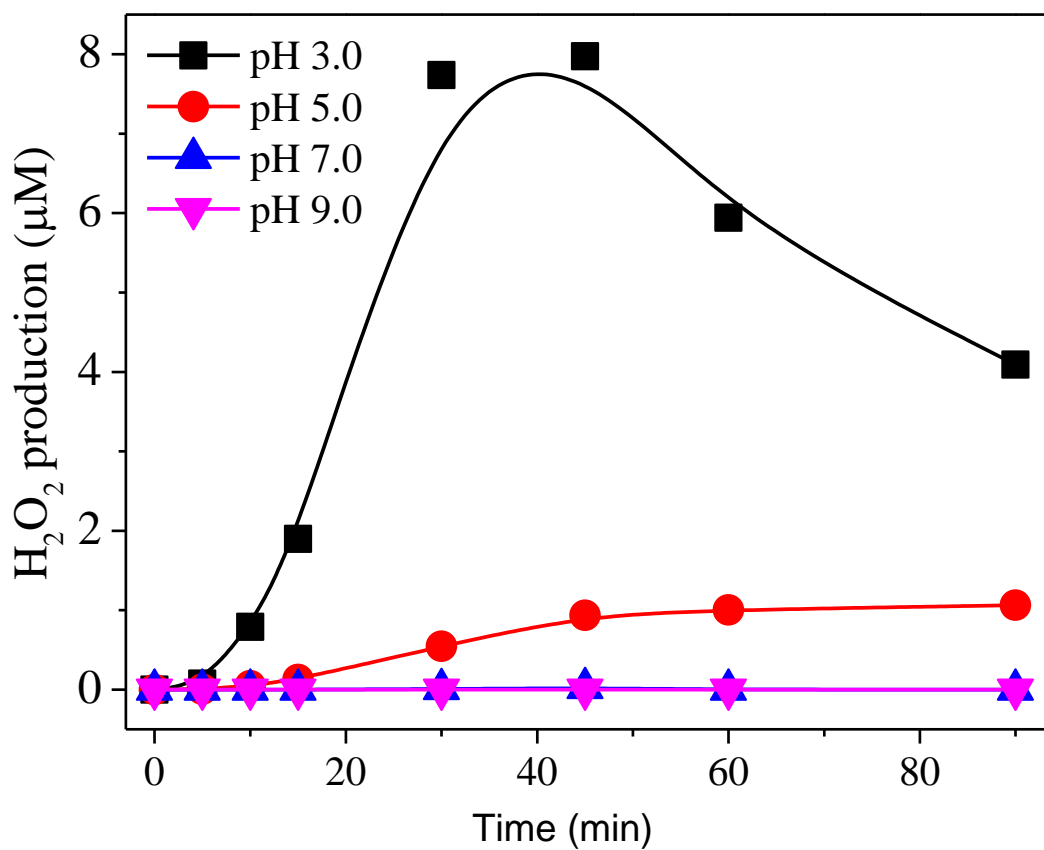

106

107 Fig.S5 Production of H<sub>2</sub>O<sub>2</sub> in ferrihydrite/oxalate system at different pH conditions. Experimental  
 108 conditions: [ferrihydrite] = 0.0125 g·L<sup>-1</sup>, [oxalate]<sub>0</sub> = 0.1 mmol·L<sup>-1</sup>

109

110

111

112

113

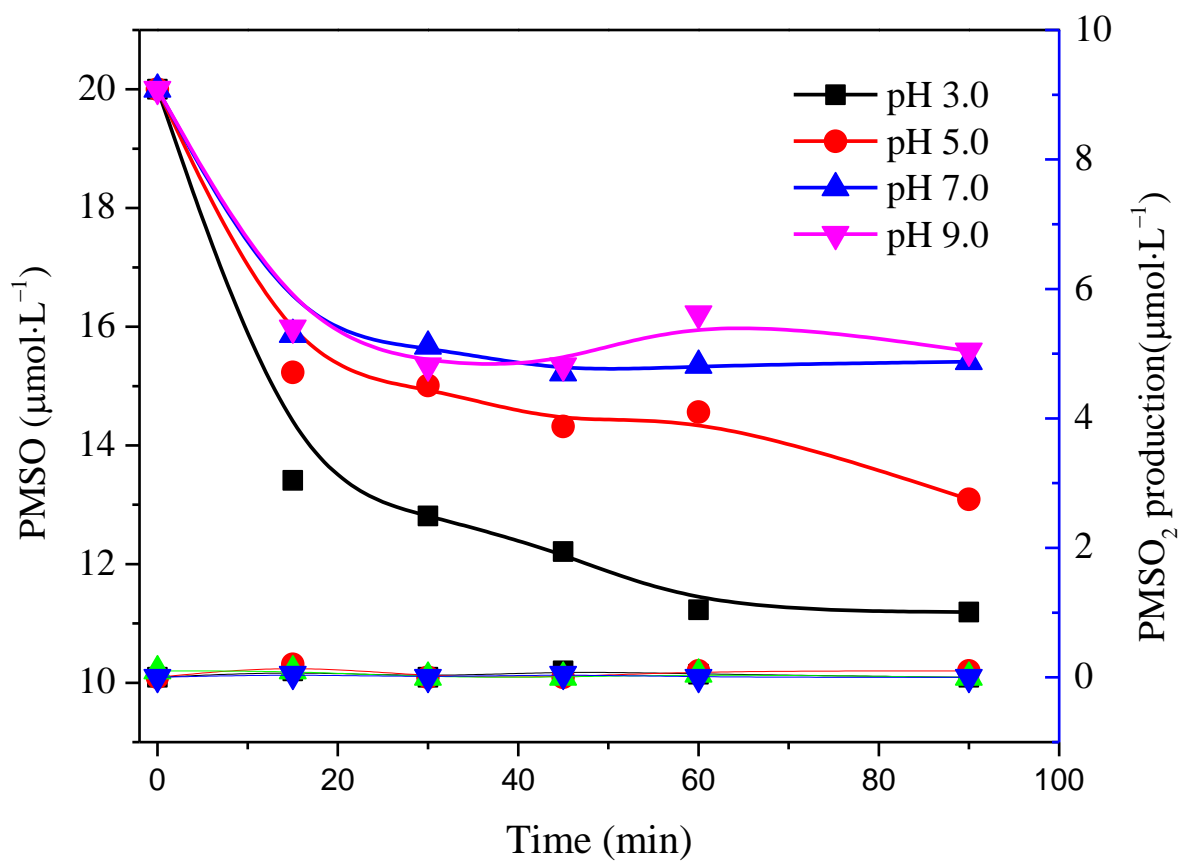

114

115 Fig.S6 Disappearance of PMSO and production of PMSO<sub>2</sub> in ferrihydrite/oxalate system under UVA

116 irradiation at different pH conditions. Experimental conditions: [PMSO]<sub>0</sub> = 20.0 μmol·L<sup>-1</sup>,

117 [ferrihydrite] = 0.0125 g·L<sup>-1</sup>, [oxalate]<sub>0</sub> = 0.1 mmol·L<sup>-1</sup>

118

119

120

121

122

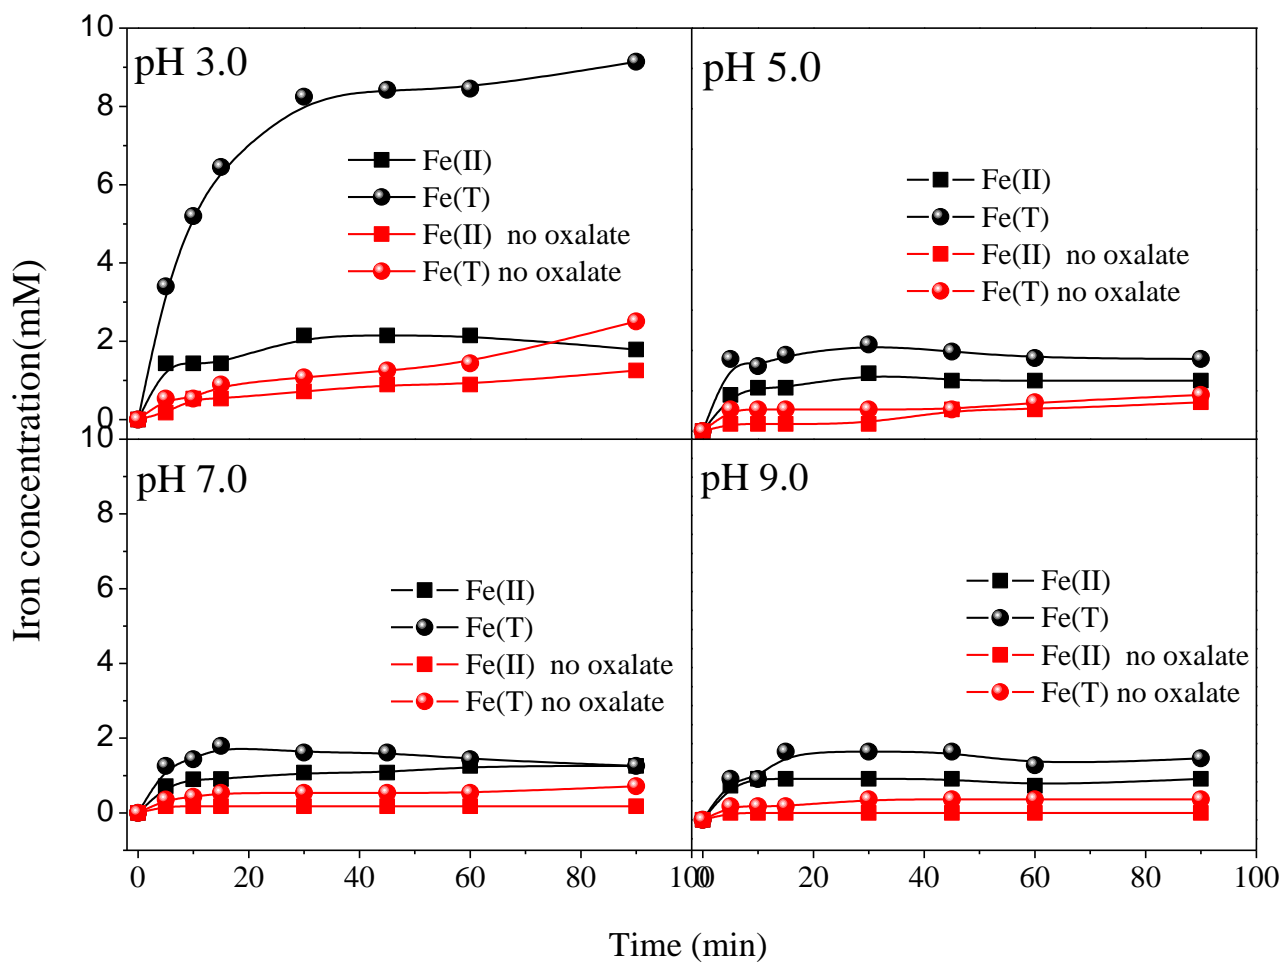

123

124 Fig.S7 Dissolved iron ions from ferrihydrite in presence and absence of  $0.1 \text{ mmol}\cdot\text{L}^{-1}$  oxalate at  
 125 different pH conditions. Experimental conditions:  $[\text{ferrihydrite}] = 0.0125 \text{ g}\cdot\text{L}^{-1}$

126

127

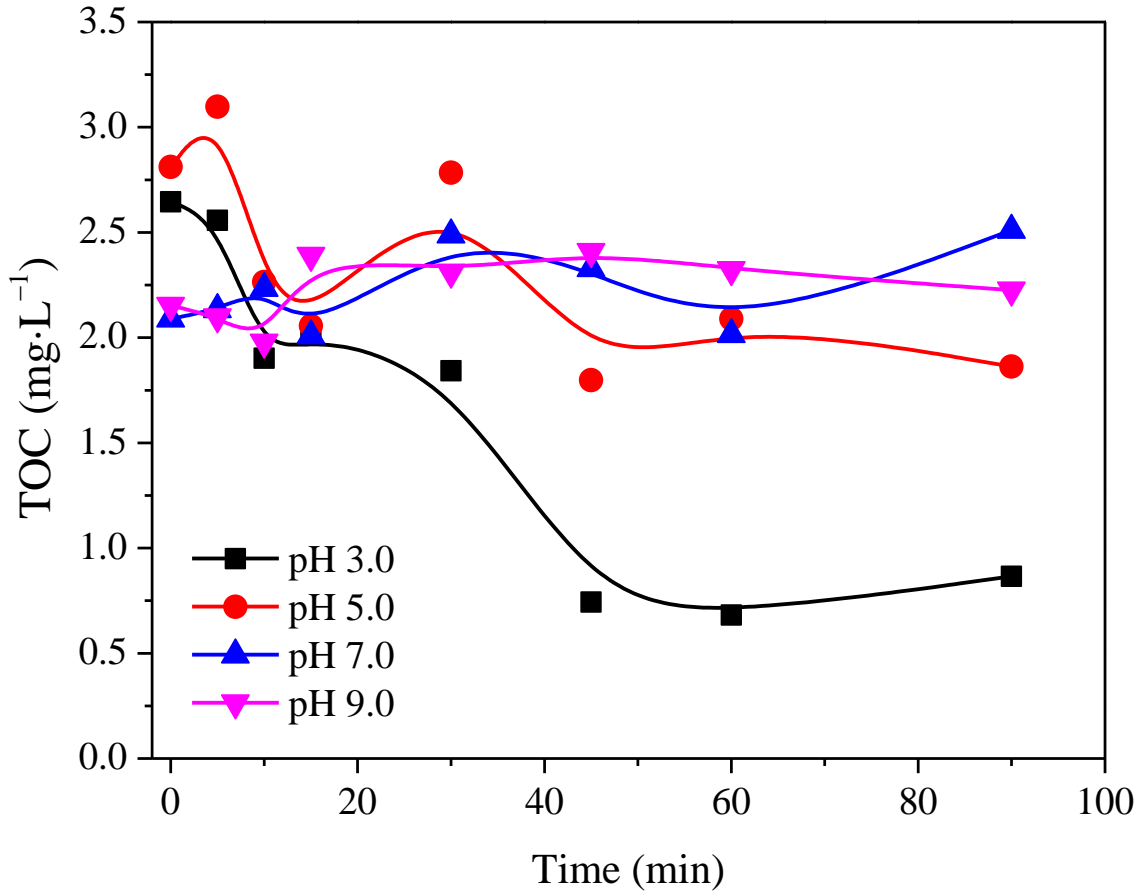

128

129 Fig.S8 Variation of TOC in ferrihydrite/oxalate under UVA-irradiation at different pH conditions.

130 Experimental conditions:  $[As]_0 = 100.0 \mu\text{g}\cdot\text{L}^{-1}$ ,  $[\text{ferrihydrite}] = 0.0125 \text{ g}\cdot\text{L}^{-1}$ ,  $[\text{oxalate}]_0 = 0.1 \text{ mmol}\cdot$

131

$\text{L}^{-1}$

132

133

134

135

136

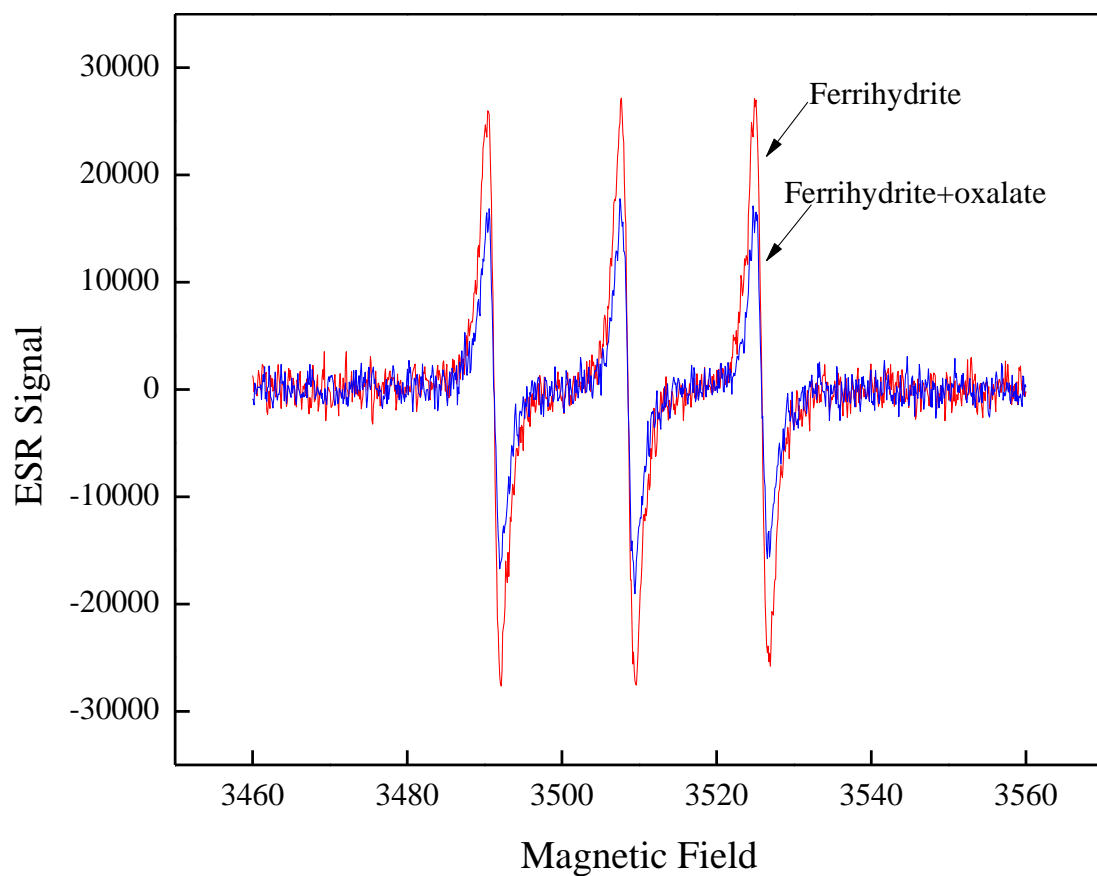

137

138 Fig.S9 ESR spectra of generated-hole in the presence and absence of  $0.1 \text{ mol}\cdot\text{L}^{-1}$  oxalate at pH 3.0

139

140

141

142

143

144

145

146

147

148

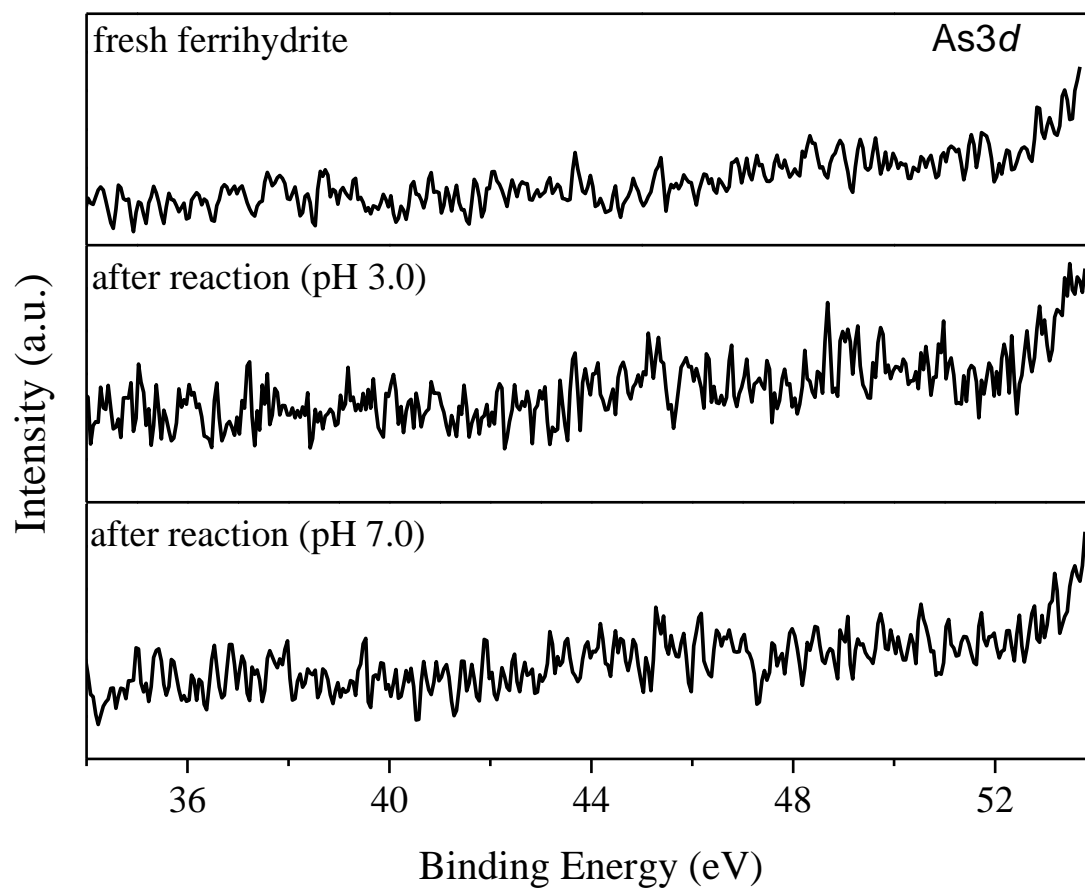

150

151

Fig.S10 XPS spectra of As 3d region of ferrihydrite before and after reaction

152

153

154

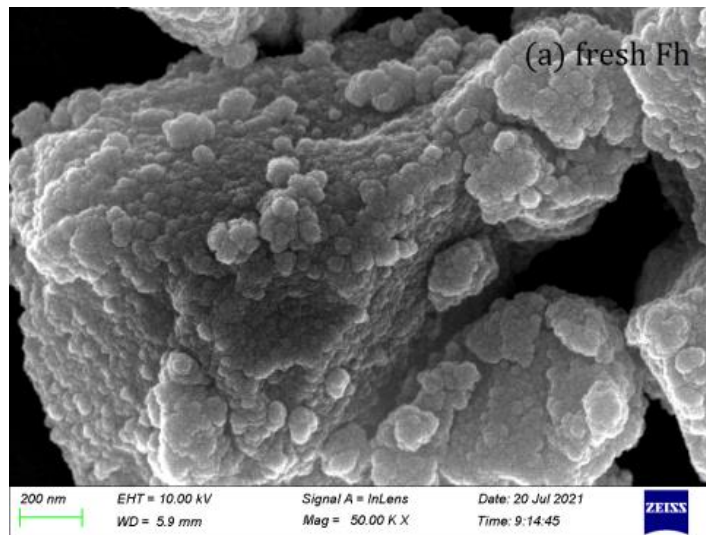

155

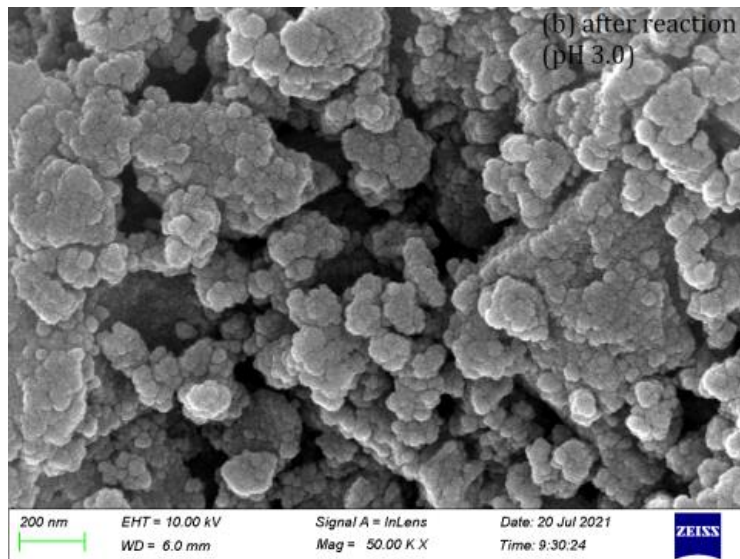

156

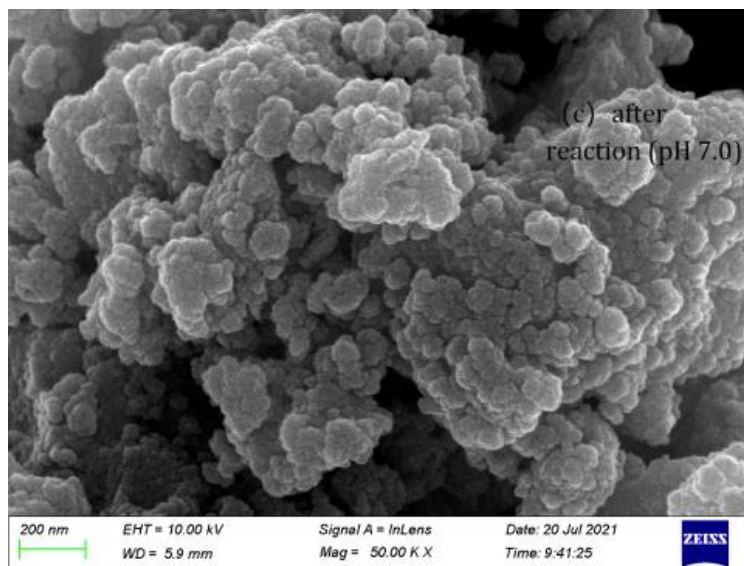

157

158

Fig.S11 SEM images of ferrihydrite before and after reaction
